# Supplementary material for: Imaging of viscoelastic soft matter with small indentation using higher eigenmodes in single-eigenmode amplitude-modulation atomic force microscopy
Source: publisher site journal article supplement (doi:10.3762/bjnano.9.103), 2018-04-06
Supplement: Additional file 1 [file 2190-4286-9-103-S1.pdf]

# **Supporting Information**

for

## **Imaging of viscoelastic soft matter with small indentation using higher eigenmodes in single-eigenmode amplitude-modulation atomic force microscopy**

Miead Nikfarjam<sup>1</sup>, Enrique A. López-Guerra<sup>2</sup>, Santiago D. Solares<sup>2</sup> and Babak Eslami\*<sup>1</sup>

Address: <sup>1</sup>Department of Mechanical Engineering, University of Maryland, College Park, MD 20740, USA and <sup>2</sup>Department of Mechanical and Aerospace Engineering, The George Washington University, Washington, DC 20052, USA

Email: Babak Eslami\* - beslami@umd.edu

\* Corresponding author

**Prony coefficients for polyisobutylene**

## Viscoelastic properties of polyisobutylene

The following plot describes the modulus (Pa) of Polyisobutylene versus different relaxation times (in seconds). This figure is a graph based on the Prony coefficients provided in Table 1, highlighting the region of interest for this study.

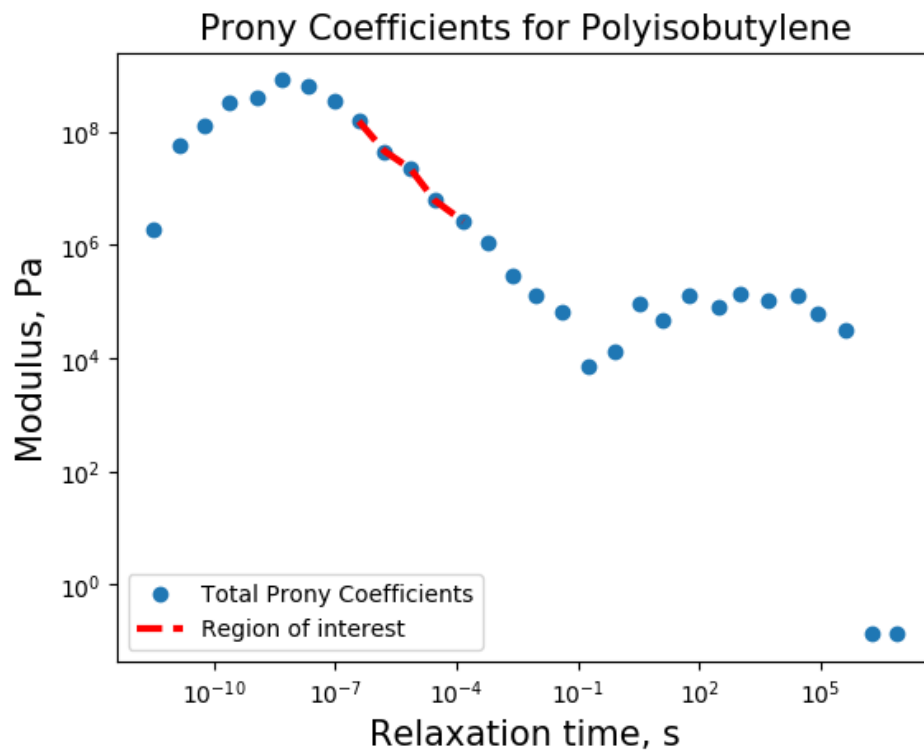

**Figure S1:** Prony Coefficients for polyisobutylene: modulus (Pa) as a function of relaxation time (s).
